# Supplementary material
Source: MDPI journal article supplement (https://www.mdpi.com/2079-9284/4/4/45)
Supplement: s1 [file s1]

# Non-targeted secondary metabolite profile study for deciphering the cosmeceutical potential of red marine macro alga *Jania rubens* - An LCMS based approach

Dhara C. Dixit<sup>1\*</sup>, C R K Reddy<sup>2</sup>

<sup>1</sup> Department of Earth & Environmental Science, Krantiguru Shyamji Krishna Verma Kachchh University, Bhuj-Kachchh, 370001, Gujarat, India;

<sup>2</sup> Discipline of Marine Biotechnology & Ecology, CSIR-Central Salt and Marine Chemicals Research Institute, Gijubhai Badheka Marg, Bhavnagar-364002, Gujarat, India; crk@csmcri.res.in

\* Correspondence: dharadixit2008@gmail.com; Tel.: +91-9979090900

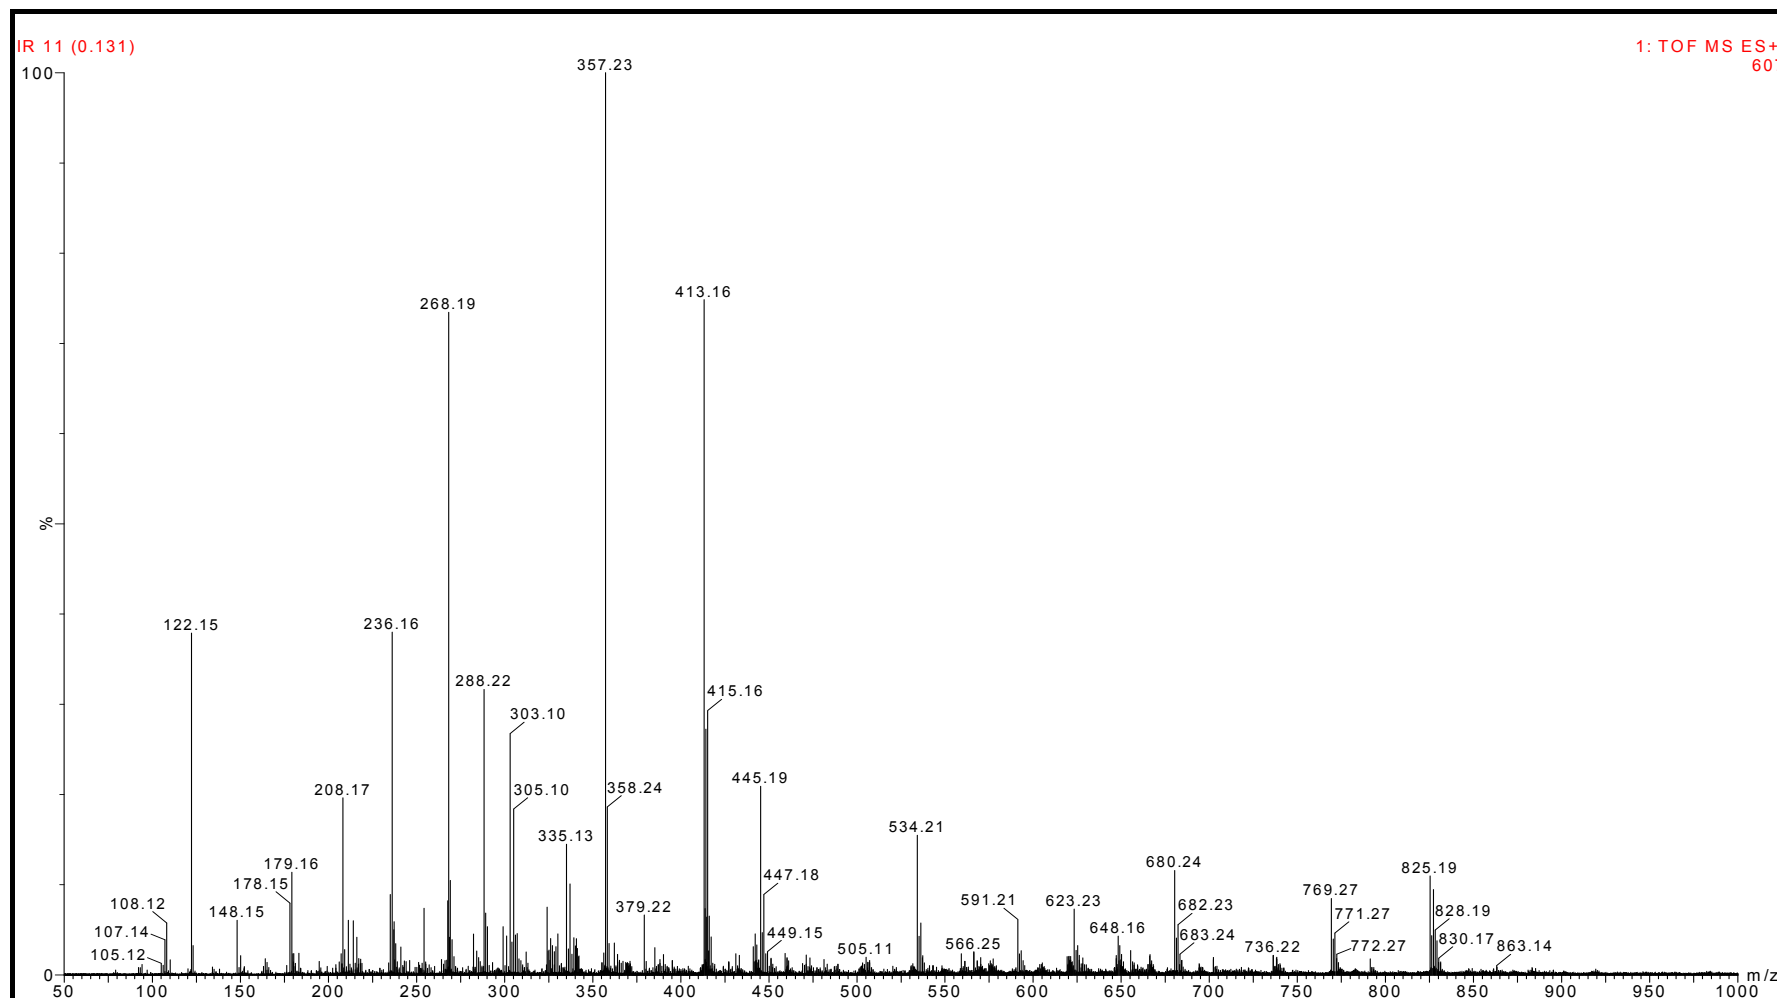

Figure S1. Metabolite Profile of *J. rubens* extract using LCMS (ESI positive mode).

**Table S1: Putative metabolites identified in *J.rubens* extract and their possible function/application/role/importance.**

| Name of the probable/putative metabolites | $\Delta$ PPM | m/z    | Formula                                         | Metlin Id. No. | LMID/KEGG/HMDB | Category/Class/<br>Sub class | Probable<br>Function/Role/Importance/Utility                                                                                                                |
|-------------------------------------------|--------------|--------|-------------------------------------------------|----------------|----------------|------------------------------|-------------------------------------------------------------------------------------------------------------------------------------------------------------|
| $\gamma$ coniceine                        | 21           | 108.12 | C <sub>8</sub> H <sub>15</sub> N                | 68145          | KEGG (C10138)  | Alkaloid                     | Biosynthesis of plant secondary metabolites. Biosynthesis of alkaloids derived from terpenoid and polyketide.                                               |
| Berberrubin                               | 17           | 305.1  | C <sub>19</sub> H <sub>16</sub> NO <sub>4</sub> | 86846          | HMDB30266      | Alkaloid                     | Berberrubine is found in fruits. Berberrubine is an alkaloid from Berberis vulgaris (barberry) Berberrubine has been found to exhibit anti-fungal function. |
| Tsangane L3 glucoside                     | 6            | 357.23 | C <sub>19</sub> H <sub>34</sub> O <sub>7</sub>  | 95286          | HMDB40824      | Terpene glycosides           | Potential aromatic compound.                                                                                                                                |
| Icaceine                                  | 4            | 358.24 | C <sub>22</sub> H <sub>33</sub> NO <sub>4</sub> | 67123          | KEGG (C08689)  | Diterpene-based alkaloid     | Used as an anticonvulsant due to its alkaloid content.                                                                                                      |
| Cubebinone                                | 0            | 413.16 | C <sub>23</sub> H <sub>26</sub> O <sub>8</sub>  | 89123          | HMDB33259      | Natural lignan compound      | Found in herbs and spices.                                                                                                                                  |
| 8-Acetoxy-4'-methoxypinoresinol           | 0            | 413.16 | C <sub>23</sub> H <sub>26</sub> O <sub>8</sub>  | 89136          | HMDB33277      | Furanoid lignans             | Aromatic heteropolycyclic compound.                                                                                                                         |

|                                      |    |        |                                                 |       |               |                                         |                                                                                                                                                                                                                                                                                                                 |
|--------------------------------------|----|--------|-------------------------------------------------|-------|---------------|-----------------------------------------|-----------------------------------------------------------------------------------------------------------------------------------------------------------------------------------------------------------------------------------------------------------------------------------------------------------------|
| Sesartemin                           | 0  | 413.16 | C <sub>23</sub> H <sub>26</sub> O <sub>8</sub>  | 68654 | KEGG (C10884) | Phenylpropanoid, Lignan                 | Aromatic heteropolycyclic compounds. This compound belongs to the class of chemical entities known as furanoid lignans. These are lignans with a structure that contains either a tetrahydrofuran ring, a furan ring, or a furofuan ring system, that arises from the joining of the two phenylpropanoid units. |
| (-)-Medicocarpin                     | 25 | 415.15 | C <sub>22</sub> H <sub>24</sub> O <sub>9</sub>  | 64291 | KEGG (C16223) | Flavonoid                               | It is found in Alfalfa.                                                                                                                                                                                                                                                                                         |
| Zizybeoside I                        | 25 | 415.15 | C <sub>19</sub> H <sub>28</sub> O <sub>11</sub> | 71779 | KEGG (C17564) | Crude drug                              | Major component of natural products. Found in Jujube seed.                                                                                                                                                                                                                                                      |
| Benzyl gentiobioside                 | 25 | 415.15 | C <sub>19</sub> H <sub>28</sub> O <sub>11</sub> | 95899 | HMDB41515     | O-glycosyl compound                     | It is found in garden tomato. Used as a nutrient.                                                                                                                                                                                                                                                               |
| 4'-O-Methylglucoliquiritigenin       | 25 | 415.15 | C <sub>22</sub> H <sub>24</sub> O <sub>9</sub>  | 94470 | HMDB39927     | Flavonoid-7-o-glycosides                | It is found in herbs and spices.                                                                                                                                                                                                                                                                                |
| Trichocarposide                      | 25 | 415.15 | C <sub>22</sub> H <sub>24</sub> O <sub>9</sub>  | 87895 | HMDB31723     | Phenolic glycoside                      | Aromatic coumaric acid ester derivative.                                                                                                                                                                                                                                                                        |
| Agecorynin C                         | 25 | 415.15 | C <sub>22</sub> H <sub>24</sub> O <sub>9</sub>  | 49925 | KEGG (C14942) | Flavonoid                               | It is found to be present in <i>Ageratum conyzoides</i> that plays a role in traditional medicine. It is widely used externally to treat skin diseases, wounds (both disinfection and homoeostasis), ulcers and boils; internally as febrifuge and to treat diarrhea and hemorrhages.                           |
| 5,6,7,8,3',4',5'-Heptamethoxyflavone | 25 | 415.15 | C <sub>22</sub> H <sub>24</sub> O <sub>9</sub>  | 49916 | KEGG (C14953) | Flavonoid (Polymethoxxygenated flavone) | Antiprotozoal, Insecticidal and allopathic.                                                                                                                                                                                                                                                                     |

|                                                |    |        |                                                  |       |               |                                          |                                                                                                                                           |
|------------------------------------------------|----|--------|--------------------------------------------------|-------|---------------|------------------------------------------|-------------------------------------------------------------------------------------------------------------------------------------------|
| 6-O-Methylarmillaridin                         | 4  | 445.18 | C <sub>25</sub> H <sub>31</sub> ClO <sub>6</sub> | 90952 | HMDB35690     | Melleolides and analogues, prenol lipids | Used as stabilizer, emulsifier and nutrient.                                                                                              |
| Eremopetasitenin B2                            | 9  | 447.18 | C <sub>24</sub> H <sub>32</sub> O <sub>7</sub> S | 87269 | HMDB30901     | Eremophilanolides (Naphthofuran)         | It is found in green vegetables. Used as a stabilizer, surfactant, emulsifier and nutrient.                                               |
| Eremosulphoxinolide A                          | 9  | 447.18 | C <sub>24</sub> H <sub>32</sub> O <sub>7</sub> S | 95915 | HMDB41532     | Terpene lactones                         | It is found in green vegetables. Used as a stabilizer, surfactant, emulsifier and nutrient.                                               |
| Agnuside                                       | 11 | 449.15 | C <sub>22</sub> H <sub>26</sub> O <sub>11</sub>  | 67924 | KEGG (C09765) | Glucoside                                | Hepatoprotective properties, anti-inflammatory, antioxidant and analgesic.                                                                |
| Simmondsin 2'-ferulate                         | 23 | 534.21 | C <sub>26</sub> H <sub>33</sub> NO <sub>12</sub> | 90759 | HMDB35475     | Coumaric acid esters                     | Aromatic compounds containing an ester derivative of coumaric acid. Found in coffee and coffee products and constituents of jojoba seeds. |
| Malonylshisonin                                | 2  | 825.19 | C <sub>39</sub> H <sub>38</sub> O <sub>21</sub>  | 46929 | KEGG C16299   | Flavonoid                                | Anthocyanin biosynthesis pathway.                                                                                                         |
| 4'''-Demalonylsalvianin                        | 2  | 825.19 | C <sub>39</sub> H <sub>38</sub> O <sub>21</sub>  | 64254 | KEGG C12641   | Flavonoid                                | Anthocyanin biosynthesis pathway.                                                                                                         |
| Maclurin 3-C-(2'',3'',6''-trigalloylglucoside) | 22 | 863.15 | C <sub>40</sub> H <sub>32</sub> O <sub>23</sub>  | 88585 | HMDB32643     | Hydrolysable Tannin                      | It is found in fruits. Its application includes that of a nutrient.                                                                       |
| Theaflavonin                                   | 25 | 919.18 | C <sub>43</sub> H <sub>36</sub> O <sub>24</sub>  | 94955 | HMDB40453     | Complex Tannin                           | It is found in tea. Used as a nutrient.                                                                                                   |
